# Supplementary material
Source: PubMed Central journal article supplement (PMC10053540)
Supplement: NIHMS1861634-supplement-SI.pdf [file NIHMS1861634-supplement-SI.pdf]

## Supplemental Information

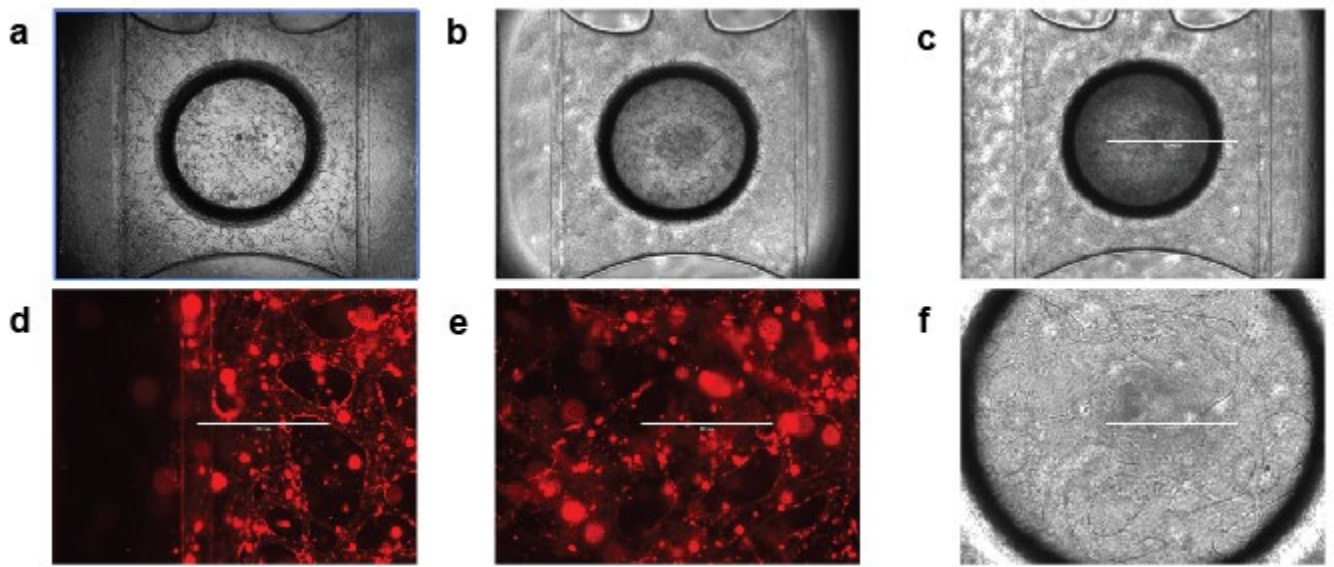

**g**

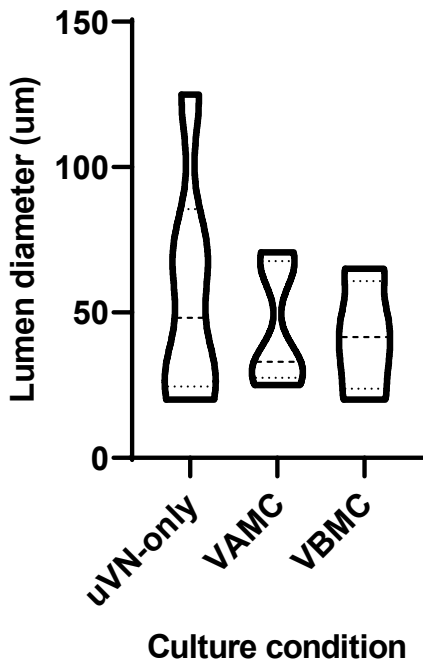

| Parameters         | uVN-only | VAMC  | VBMC  |
|--------------------|----------|-------|-------|
| Minimum            | 20.02    | 25.00 | 20.00 |
| 25% Percentile     | 24.51    | 27.50 | 23.75 |
| Median             | 48.23    | 33.02 | 41.51 |
| 75% Percentile     | 85.57    | 67.68 | 60.76 |
| Maximum            | 125.0    | 70.71 | 65.01 |
| Mean               | 56.65    | 44.67 | 42.01 |
| Std. Deviation     | 39.84    | 21.30 | 19.13 |
| Std. Error of Mean | 16.27    | 9.526 | 9.567 |

**Supplemental figure 1.** Co-culture of respiratory epithelial cells and vascular bed. **(a)** DIV0 of seeding (Dil-stained HPMEC and fibroblasts, pericytes in the gel chamber; non-Dil-stained HPMEC in the side channels). **(b)** DIV7 pre-ALI epithelial layer over open access of gel chamber. **(c)** 48h post-ALI induction on epithelial layer on top of the vasculature. **(a)-(c)** taken on EVOS at 4x objective. **(d)** RFP channel at the side lane-gel chamber interface; only Dil-stained cells that were seeded in the gel are making up the vasculature, not the unstained cells from the side lanes. **(e)** RFP channel on the open access in the gel chamber, showing vascularization by the Dil-stained endothelial cells. **(f)** brightfield image of **(e)**. **(g)** Comparison of lumen diameters from **figure 2e-g** (vessels with asterisk). Statistics table provided adjacent to violin plot. **(a)-(c)** taken on EVOS at 4x objective, 1000  $\mu\text{m}$  scale bar. **(d)-(f)** taken on EVOS at 10x objective 400  $\mu\text{m}$  scale bar.

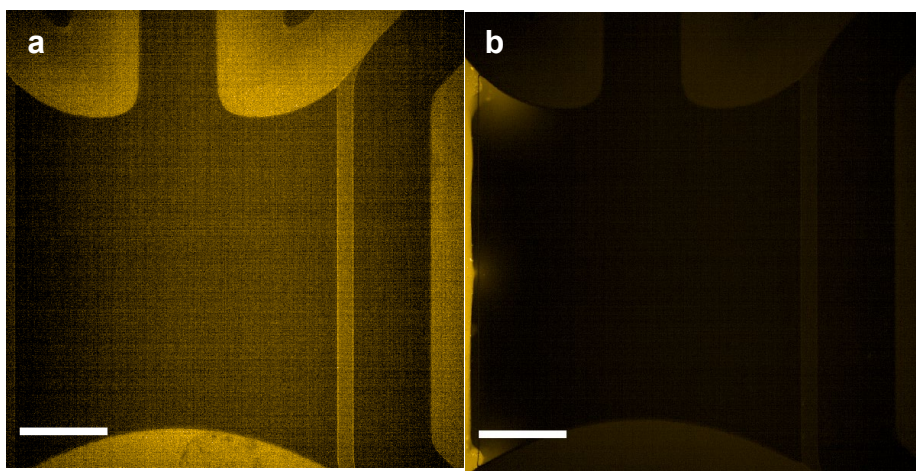

70 kDa Texas Red Dextran

**Supplemental figure 2.** Cell-free control and side lanes with empty gel controls for perfusion assay. (a) cell-free control, only fibrin gel in the gel chamber; no cells. (b) vasculature control, only endothelial cells in the side lanes, no cells in the gel chamber, only fibrin gel. Scale bar = 500  $\mu\text{m}$

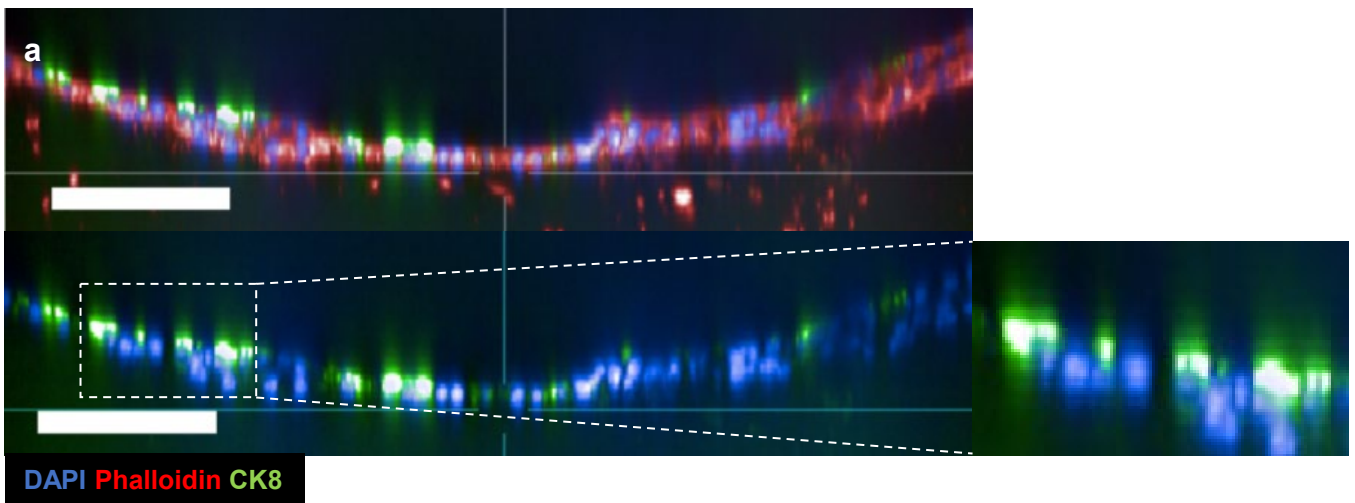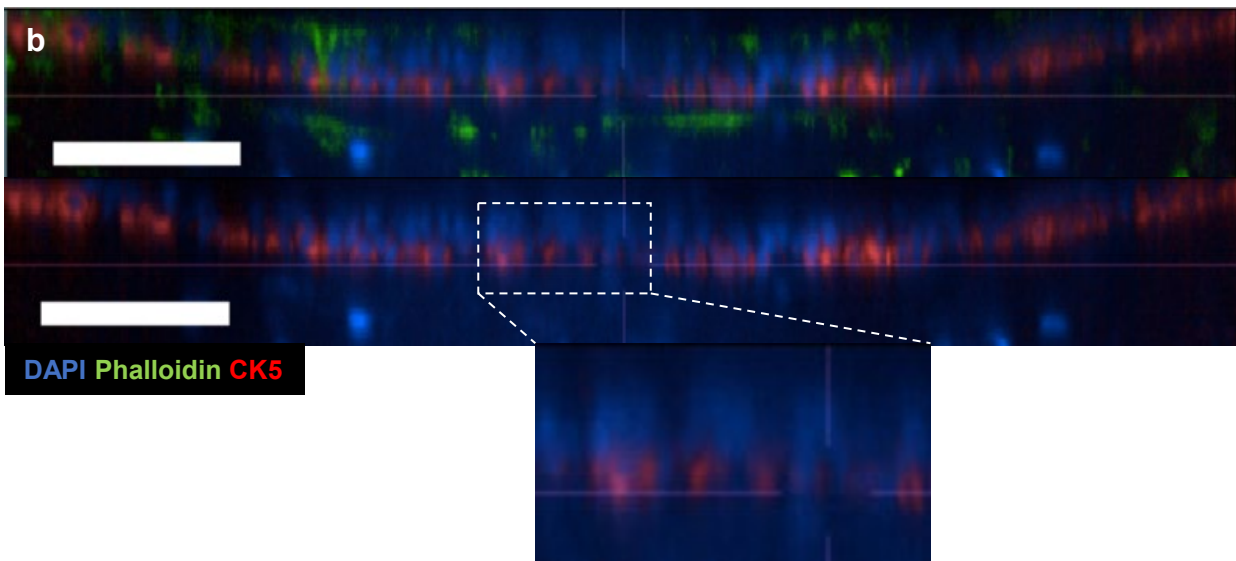

**Supplemental figure 3.** (a) z-stack of CK8 localization in alveolar cells against phalloidin. It can be observed that CK8 lies closely near the nuclei localization indicating, most cells are non-columnar, and those expressing CK8 may be more like type-2 cells (since they are more cuboidal shaped/less flat morphologically). (b) z-stack of CK5 localization in small airway epithelial cells against phalloidin. Compared to alveolar cells, the nuclei/DAPI extends much more upwards than the CK5 localization, indicating that there is polarity in CK5 expression and that the elongated nuclei indicate columnar-like cells. Taken with Opera Phenix. Scale bar = 100  $\mu\text{m}$ .

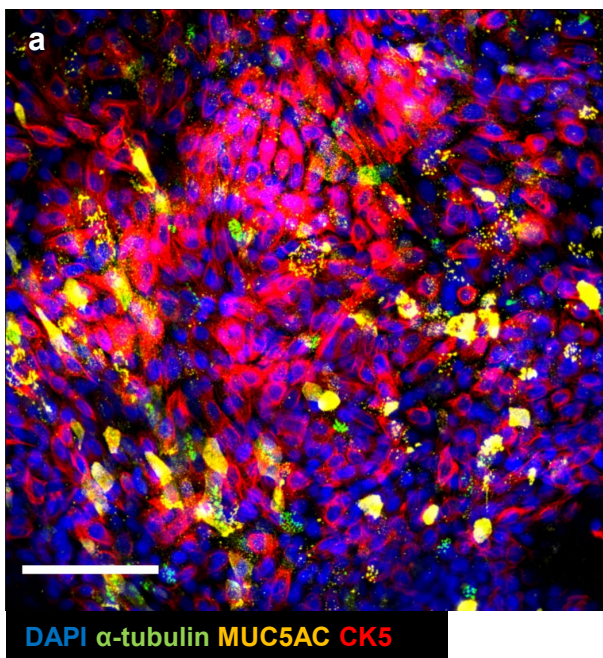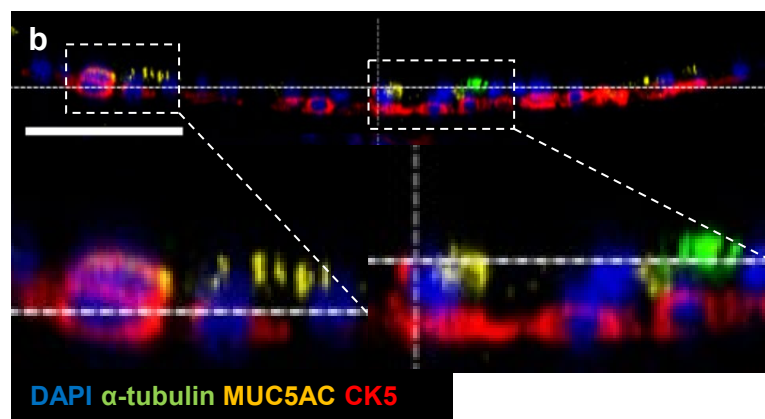

**Supplemental figure 4.** (a) Vascularized bronchiolar-multi chip model along the surface of open access (a-tubulin green, ACE2 magenta). At maximum projection, the small green puncta is most likely the protruding  $\alpha$ -tubulin forming cilia. Taken with Leica confocal for better resolution. (b) z-stack of stratified columnar epithelium. The cilia can be clearly seen in the magnification box(es) for region(s) of interest. It can also be noted that CK5-positive cells are positioned basolaterally and the cells expressing either MUC5AC or  $\alpha$ -tubulin are sitting superior to the CK5-positive cells. Taken with Leica confocal microscopy. Scale bar = 100  $\mu$ m.

## Supplemental video(s) captions

**Supplemental video 1.** 3D reconstruction of alveoli-capillary construct in **figure 1d**. Allows for spatial visualization and localization of CD31, CK8 for specific cell types. The vascular network perfuses and allows for support of alveolar epithelial layer on the top.

**Supplemental video 2.** 3D reconstruction of SAEC-capillary construct in **figure 1e**. Creates a more detailed 3-dimensional reconstruct of the vascular network that is essential to perfusing the small airway epithelial cells and for maturation of the epithelial population.

**Supplemental video 3.** Localization of extracellular matrix (ECM) proteins on vascular and epithelial layers in vascularized alveolar multi-chip (VAMC, top panel) and vascularized bronchiolar multi-chip models (VBMC, bottom panel). COL IV and/or III green; F-actin red; nuclei blue.

**Supplemental video 4.** Operation of World Precision Instrument trans-epithelial/endothelial electrical resistance (TEER) automation system, re-calibrated to measure on the 64-chip based microfluidic platform.
